# Supplementary material for: The Unusual Resistance of Avian Defensin AvBD7 to Proteolytic Enzymes Preserves Its Antibacterial Activity
Source: PubMed Central journal article supplement (PMC4999073; doi:10.1371/journal.pone.0161573), 2016-08-25

A

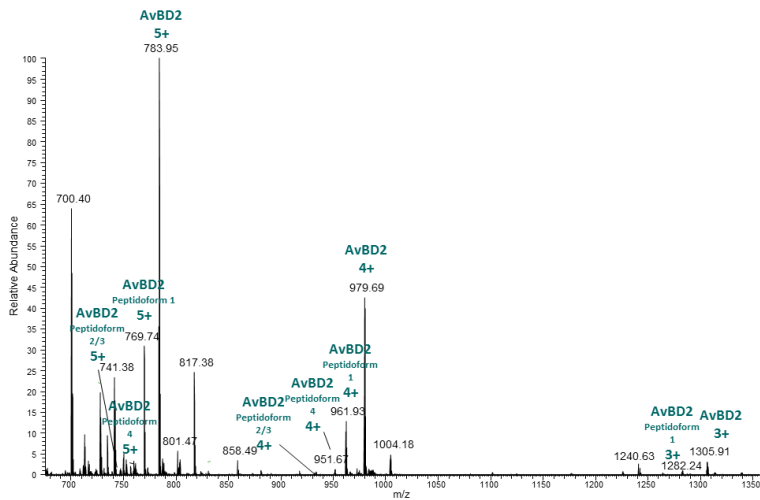

| Protein description  | m/z precursor (average) | z | Observed monoisotopic mass [M+H] <sup>+</sup> | Theoretical monoisotopic mass [M+H] <sup>+</sup> | Delta mass (Da) | Prosight probability E-value | b ions | y ions | Total ions |
|----------------------|-------------------------|---|-----------------------------------------------|--------------------------------------------------|-----------------|------------------------------|--------|--------|------------|
| AvBD 2 full-length   | 1305.91                 | 3 | 3913.7380                                     | 3913.7178                                        | 0.0202          | 1.14E-04                     | 3      | 5      | 8          |
| AvBD 2 peptidoform 1 | 961.92                  | 4 | 3842.7092                                     | 3842.6807                                        | 0.0285          | 1.E-07                       | 3      | 7      | 10         |
| AvBD 2 peptidoform 2 | 933.41                  | 4 | 3728.6644                                     | 3728.6378                                        | 0.0266          | 9.36E-06                     | 6      | 4      | 10         |
| AvBD 2 peptidoform 3 | 933.41                  | 4 | 3729.6676                                     | 3729.5967                                        | 0.0709          | 9.36E-06                     | 3      | 6      | 9          |
| AvBD 2 peptidoform 4 | 951.16                  | 4 | 3800.6676                                     | 3800.6338                                        | 0.0338          | 4.35E-06                     | 6      | 4      | 10         |

### AvBD2 : full-length

LFCKGGSCHFGGCPSHLIKVGSCFGFRSCCKWPWNA

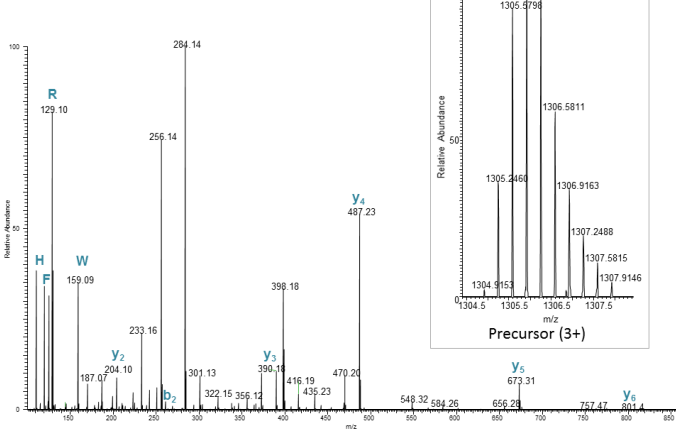

### AvBD2 : peptidoform 1

LFCKGGSCHFGGCPSHLIKVGSCFGFRSCCKWPWN

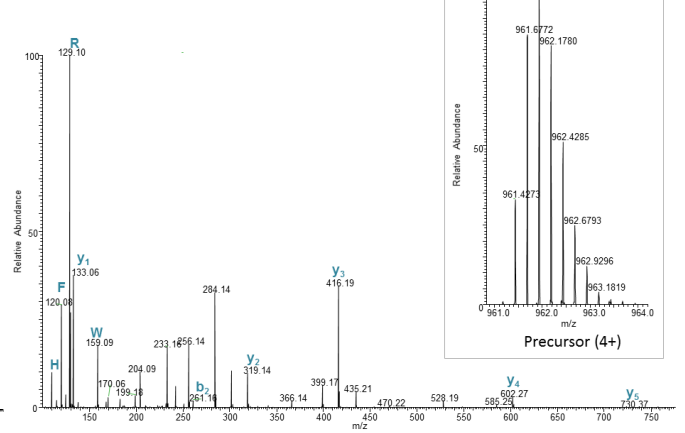

### AvBD2 : peptidoform 2 and 3

LFCKGGSCHFGGCPSHLIKVGSCFGFRSCCKWPW

FCKGGSCHFGGCPSHLIKVGSCFGFRSCCKWPWN

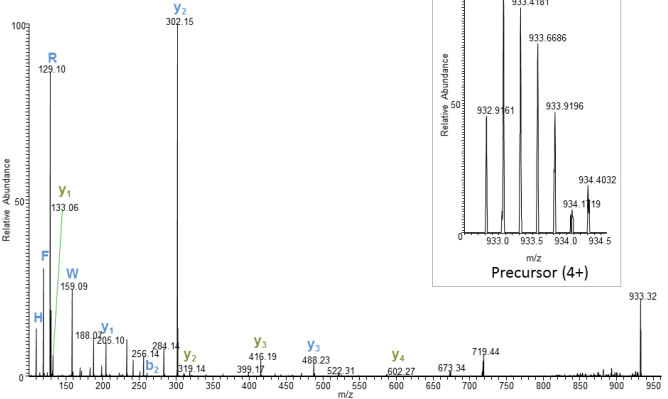

### AvBD2 : peptidoform 4

FCKGGSCHFGGCPSHLIKVGSCFGFRSCCKWPWNA

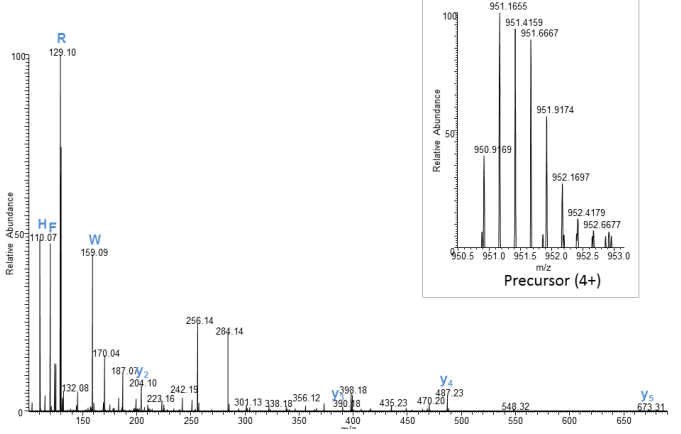

**B** NanoESI-MS spectra for structural characterization of AvBD1 and AvBD7 peptideforms

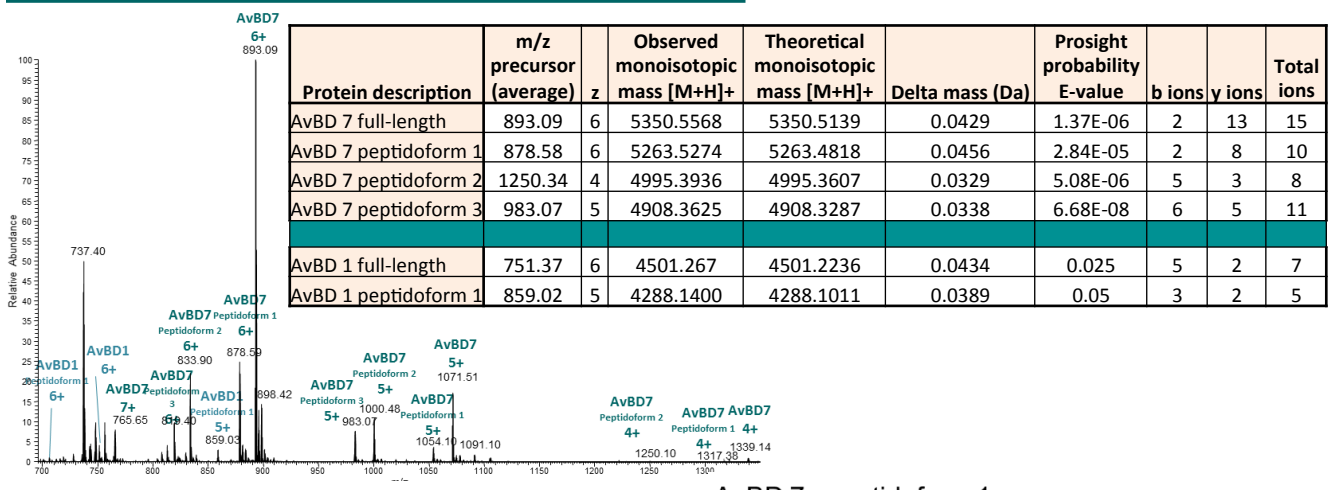

AvBD 7 : full-length

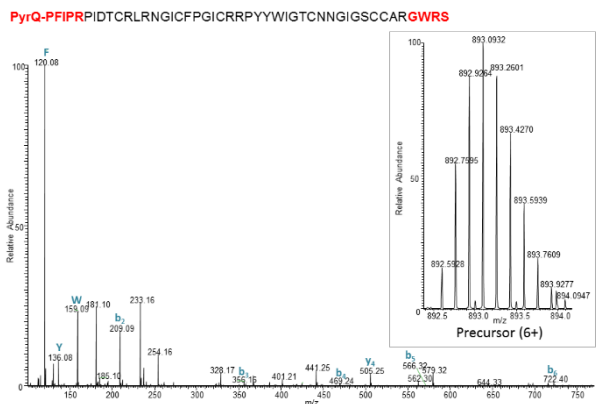

AvBD 7 : peptideform 1

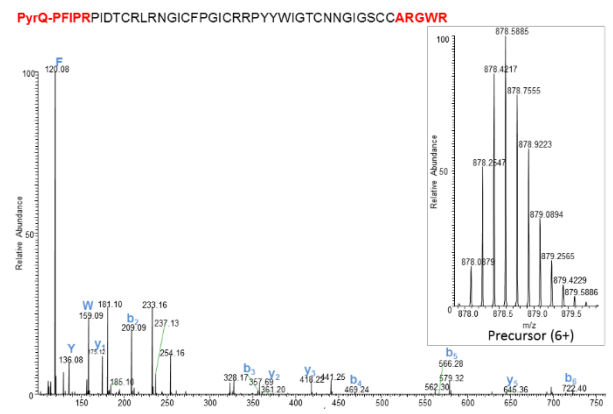

AvBD 7 : peptideform 2

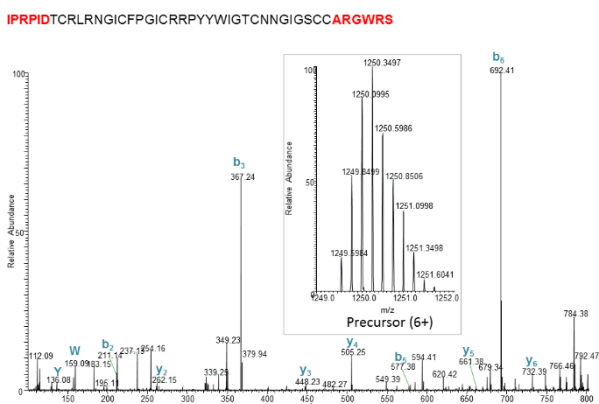

AvBD 7 : peptideform 3

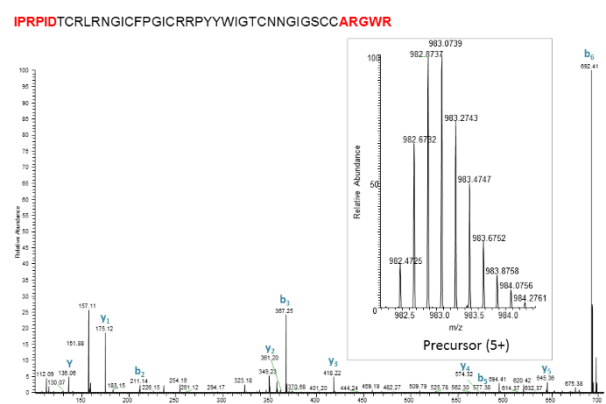

AvBD1 : full-length

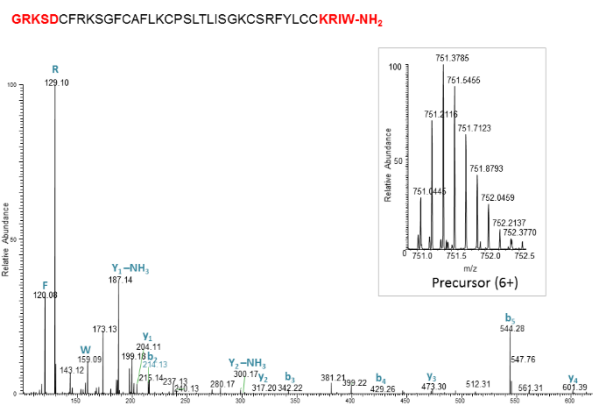

AvBD1 : peptideform 1

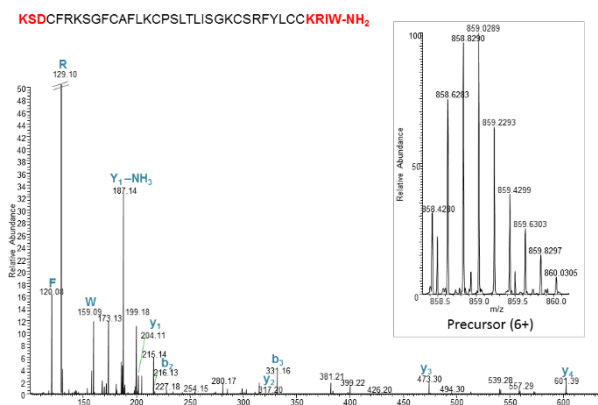

Supplement: pone.0161573.s001.pdf [file pone.0161573.s001.pdf]
