# Supplementary material for: The Unusual Resistance of Avian Defensin AvBD7 to Proteolytic Enzymes Preserves Its Antibacterial Activity
Source: PubMed Central journal article supplement (PMC4999073; doi:10.1371/journal.pone.0161573), 2016-08-25

**A**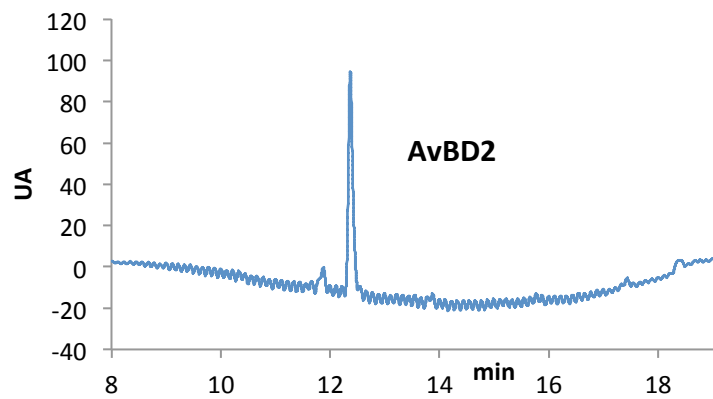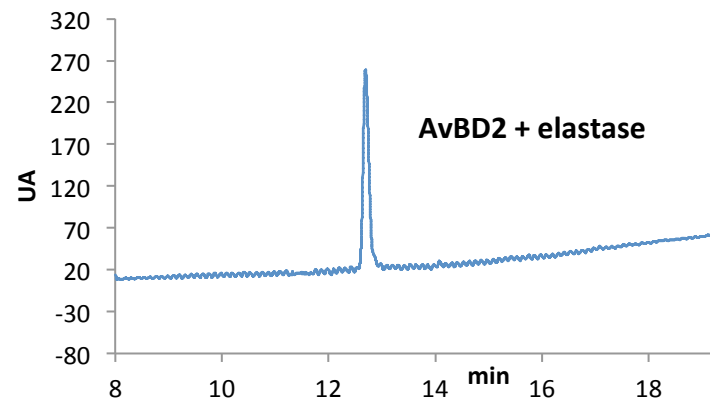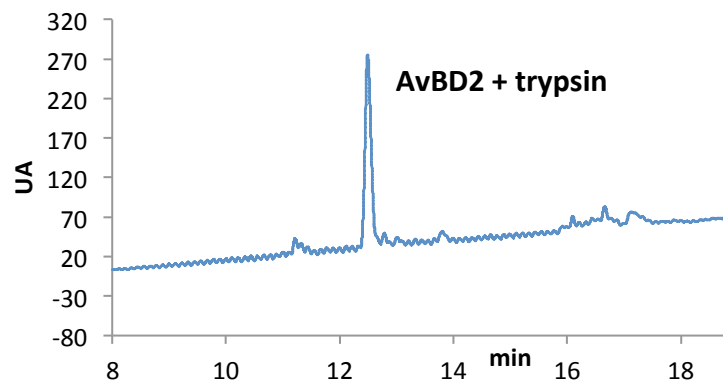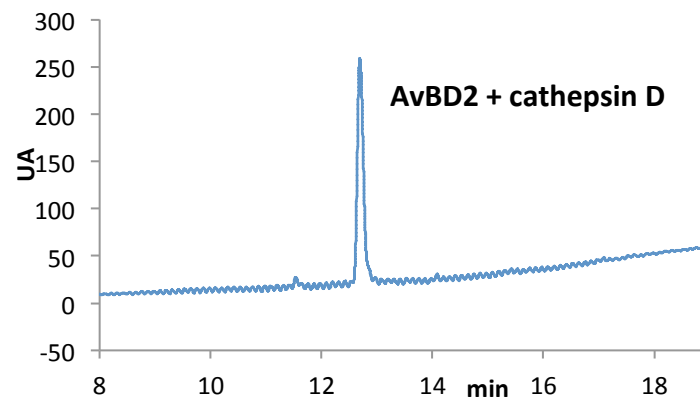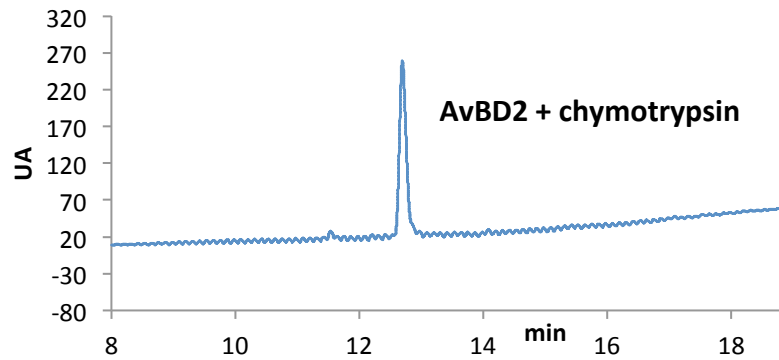

**B**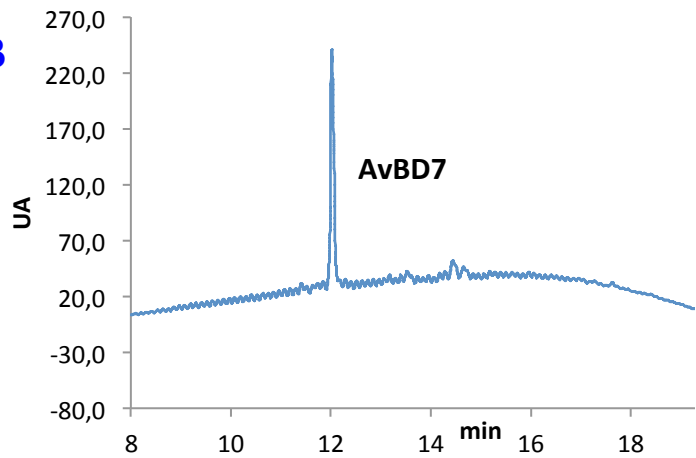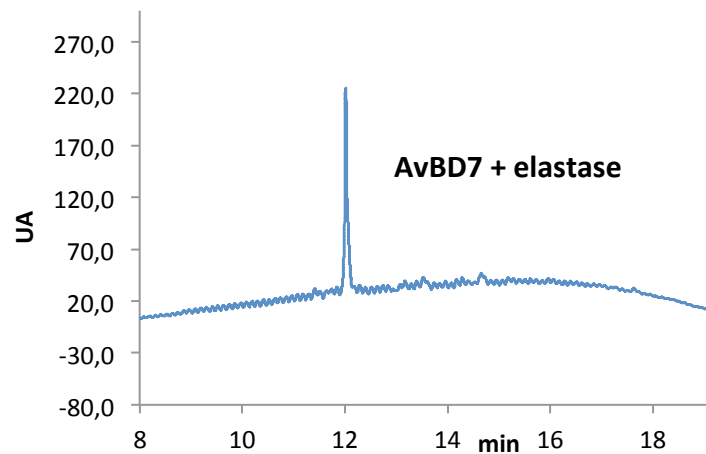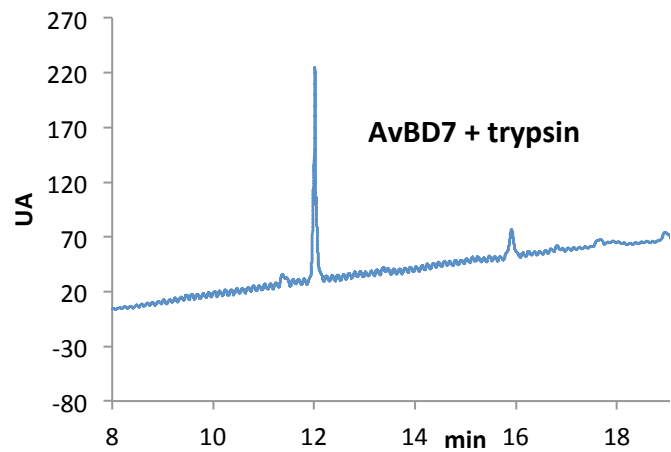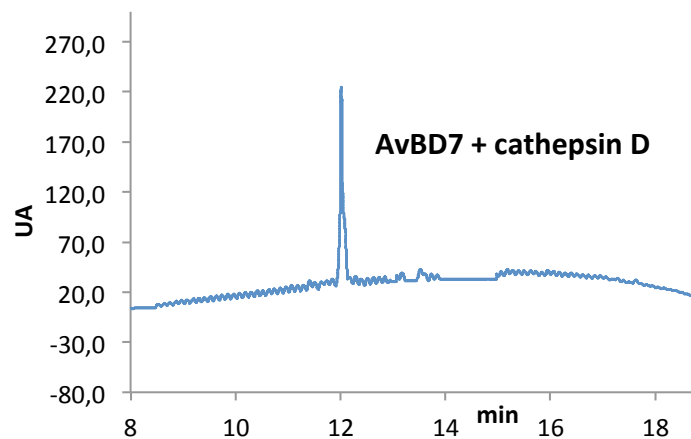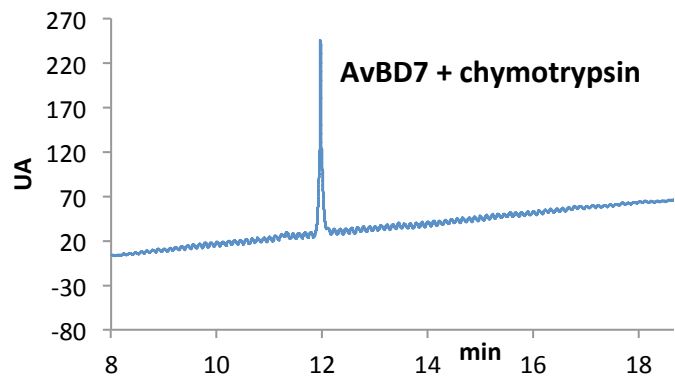

Supplement: pone.0161573.s002.pdf [file pone.0161573.s002.pdf]
